# Supplementary material for: Geo-social gradients in predicted COVID-19 prevalence in Great Britain: results from 1 960 242 users of the COVID-19 Symptoms Study app
Source: PubMed Central journal article supplement (PMC8223682; doi:10.1136/thoraxjnl-2020-215119), 2020-12-29

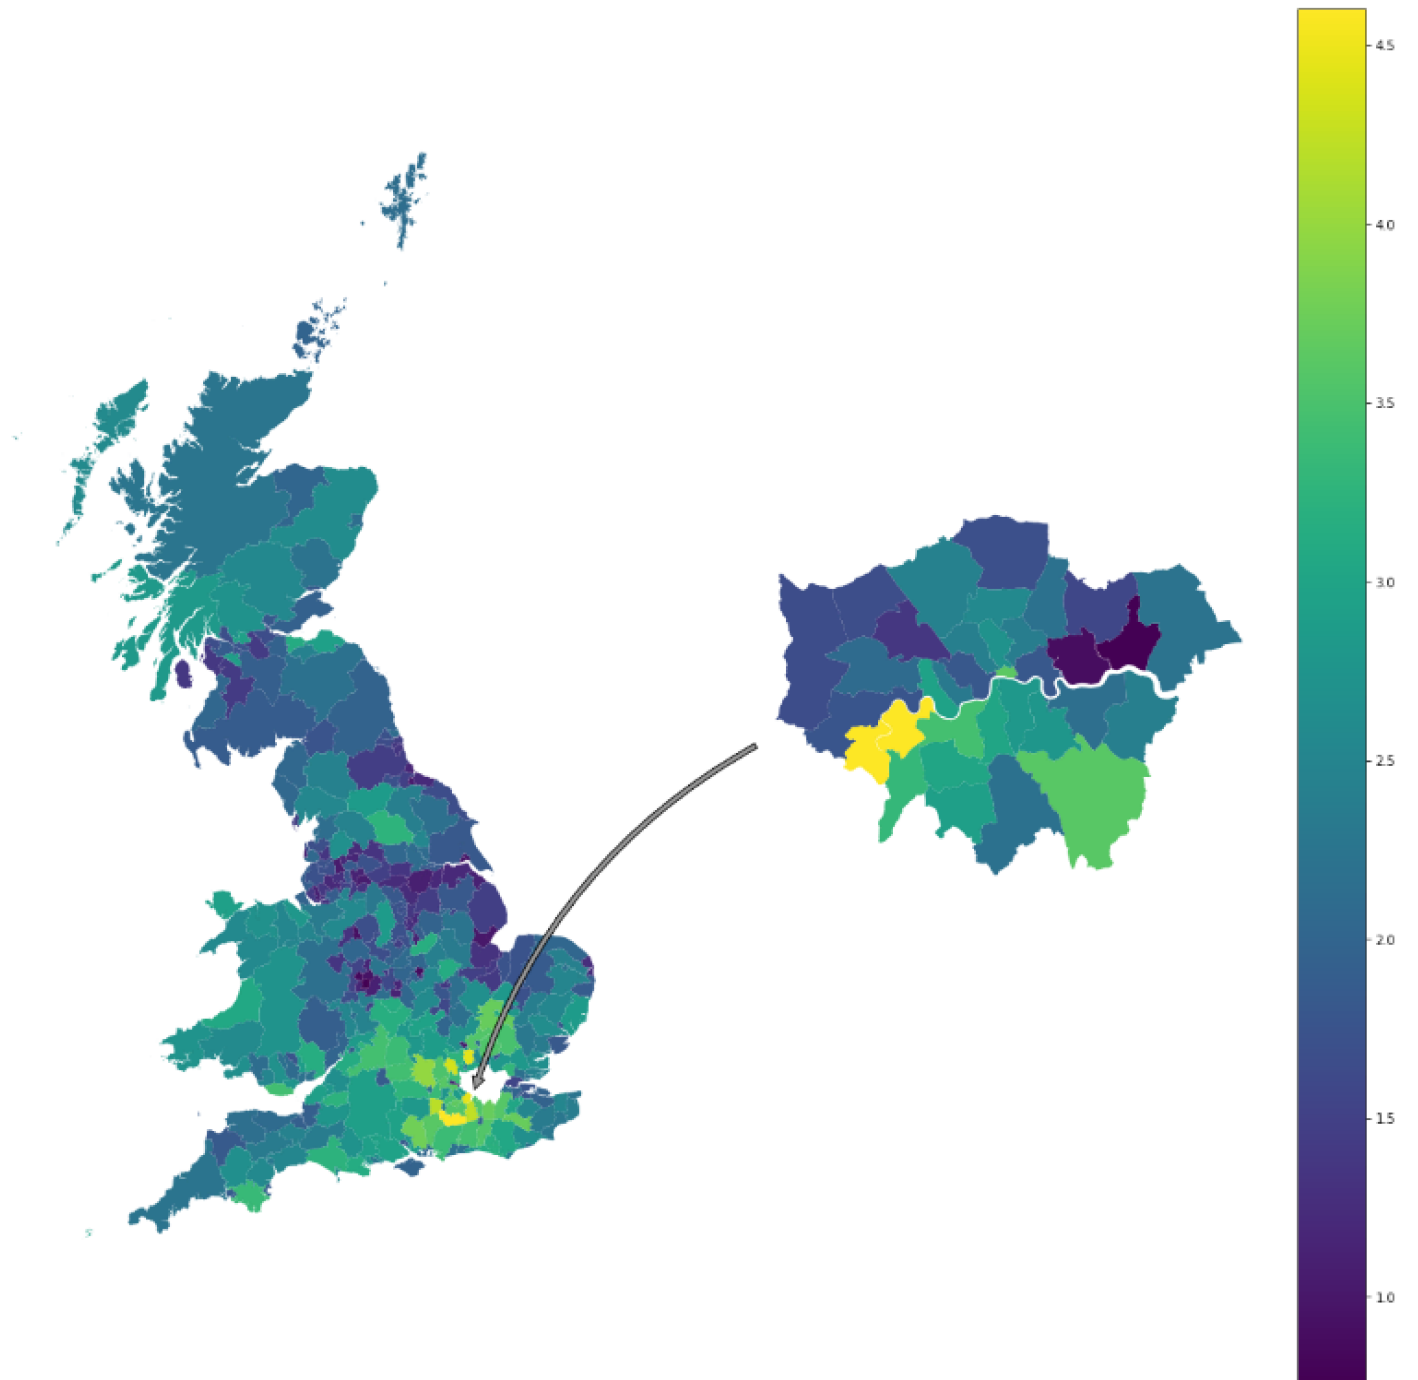

Supplement: thoraxjnl-2020-215119supp002.pdf [file thoraxjnl-2020-215119supp002.pdf]
