# Supplementary material for: Geo-social gradients in predicted COVID-19 prevalence in Great Britain: results from 1 960 242 users of the COVID-19 Symptoms Study app
Source: PubMed Central journal article supplement (PMC8223682; doi:10.1136/thoraxjnl-2020-215119), 2020-12-29

## Predicted Covid-19 +ve cases in GB with highlighted spatially significant hotspots

2020/03/29

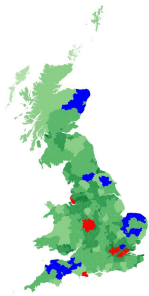

2020/04/01

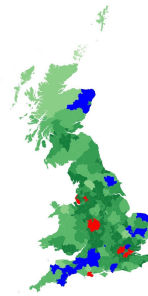

2020/04/04

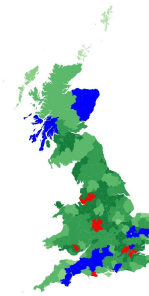

2020/04/07

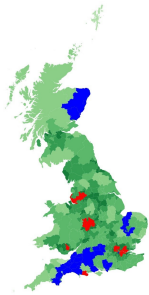

2020/04/10

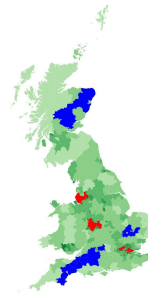

2020/04/13

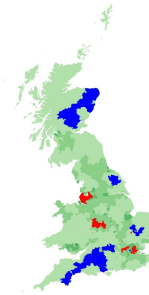

2020/04/16

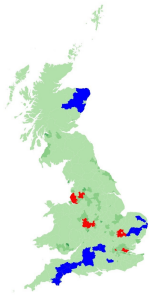

2020/04/19

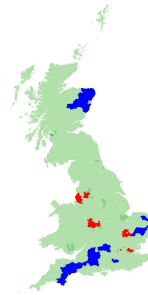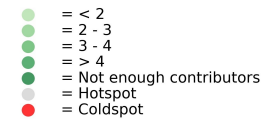

Supplement: thoraxjnl-2020-215119supp003.pdf [file thoraxjnl-2020-215119supp003.pdf]
