# Supplementary figures and images for: Geo-social gradients in predicted COVID-19 prevalence in Great Britain: results from 1 960 242 users of the COVID-19 Symptoms Study app
Source: HighWire-hosted journal article supplement (doi:10.1136/thoraxjnl-2020-215119), 2020-12-29

Predicted Covid-19 +ve cases in GB with highlighted spatially significant hotspots

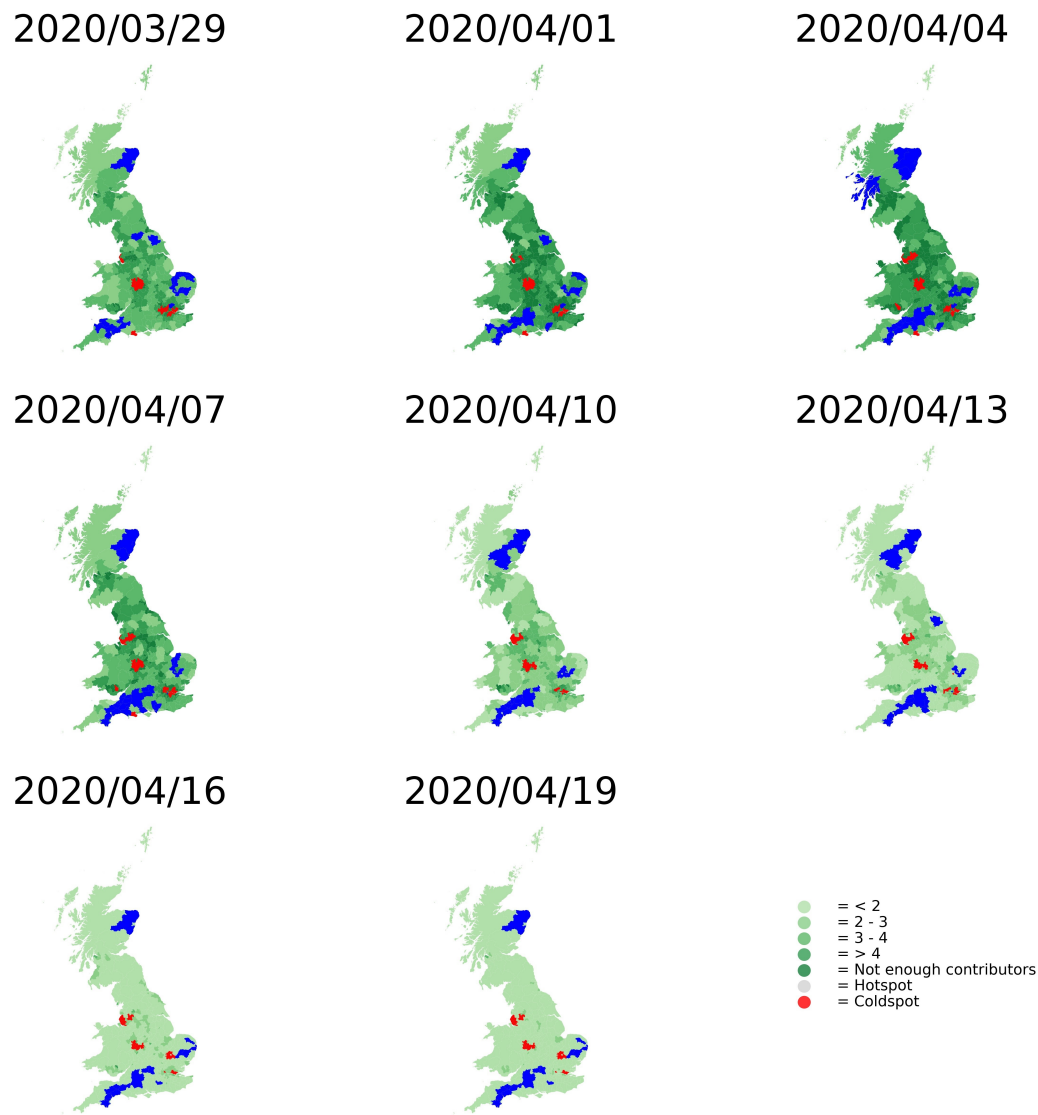

Supplement: thoraxjnl-2020-215119supp003_data_supplement.pdf [file thoraxjnl-2020-215119supp003_data_supplement.pdf]
